# Supplementary material
Source: PubMed Central journal article supplement (PMC3705614)
Supplement: 97320630009450S1.pdf [file 97320630009450S1.pdf]

## Supplementary material:

**Table 1:** Dimer interacting residues of the hLrf-BTB domain, and the corresponding 9probable dimer interacting residues of the mKeap1-BTB domain

| S. No. | Lrf Dimer residues | Keap1 probable dimer residues |
|--------|--------------------|-------------------------------|
| 1      | Ile933             | Phe52                         |
| 2      | Ile11              | Tyr54                         |
| 3      | Phe13              | Leu56                         |
| 4      | His16              | His59                         |
| 5      | Ser17              | Thr60                         |
| 6      | Ser18              | Lys61                         |
| 7      | Ile20              | Ala63                         |
| 8      | Leu21              | Phe64                         |
| 9      | Leu24              | Met67                         |
| 10     | Gln27              | Leu70                         |
| 11     | Leu33              | Leu76                         |
| 12     | His48              | His96                         |
| 13     | Ser50              | Val98                         |
| 14     | Val51              | Val99                         |
| 15     | Ala54              | Ser102                        |
| 16     | Phe91              | Phe139                        |
| 17     | Ala92              | Ala140                        |
| 18     | Ala95              | Ala143                        |
| 19     | Leu97              | Ile145                        |
| 20     | Val99              | Val147                        |

**Table 2:** The potential Cul3 interacting residues of hKLHL11, and the corresponding probable Cul3 interacting residues of mouse Keap1

| S. No                    | Cul3 (interacting residues) | KLHL11 (interacting residues) | mKeap (probable interacting residues) | Cul3 |
|--------------------------|-----------------------------|-------------------------------|---------------------------------------|------|
| Hydrophilic Interactions |                             |                               |                                       |      |
| 1                        | Glu55                       | Tyr121                        | Val106                                |      |
| 2                        | Leu52                       | Ser131                        | Arg116                                |      |
| 3                        | Ser53                       | Glu132                        | Glu117                                |      |
|                          | Phe54                       |                               |                                       |      |
| 4                        | Glu55                       |                               |                                       |      |
|                          | Tyr58                       | Arg182                        | Met161                                |      |
|                          | Glu55                       |                               |                                       |      |
| 5                        | Lys68                       | His213                        | Glu192                                |      |
| 6                        | Asn49                       | Gln129                        | Gly114                                |      |
| 7                        | Ile18                       | Thr170                        | Glu149                                |      |
| 8                        | Tyr125                      | Asp181                        | Val160                                |      |
| 9                        | Gln133                      | Thr216                        | Gly195                                |      |
| Hydrophobic Interactions |                             |                               |                                       |      |
| 10                       | Met124                      | Glu120                        | Pro105                                |      |
| 11                       | Asp121                      | Pro124                        | Ala109                                |      |
| 12                       | Phe54                       | Leu125                        | Met110                                |      |
| 13                       | Leu52                       | Phe130                        | Leu115                                |      |
|                          | Phe54                       |                               |                                       |      |
| 14                       | Tyr62                       | Arg182                        | Met161                                |      |
| 15                       | Pro22                       | Met214                        | Gln193                                |      |
| 16                       | Pro22                       | Pro245                        | Ser224                                |      |
